# Supplementary material for: Individuals at increased risk for development of bipolar disorder display structural alterations similar to people with manifest disease
Source: Springer Nature journal article supplement (doi:10.1038/s41398-021-01598-y), 2021-09-20

## **Individuals at increased risk for development of bipolar disorder display structural alterations similar to people with manifest disease**

### **Supplementary materials**

**Supplementary Note 1:** Power analysis

**Supplementary Note 2.** Inclusion and exclusion criteria for the Early-BipoLife study.

**Supplementary Table 1.** Overview of instruments for the bipolar risk assessment tools.

**Supplementary Table 2.** Breakdown of demographic characteristics per study site.

**Supplementary Table 3.** Breakdown of lithium intake per recruitment pathway.

**Supplementary Table 4.** *EPIbipolar* risk criteria.

**Supplementary Figure 1.** Partial plot for the linear effect of *EPIbipolar* risk on thickness of the left pars opercularis.

### **Supplementary Note 1: Power analysis**

We performed the power estimation in performed in G\*Power v.3.1.9.4. The target  $N = 310$  would achieve a power of 70% and an alpha-error probability of 0.075. The calculation was based on the estimated effect sizes in prior studies: left pars opercularis Cohen's  $d = -.293$  [9], hippocampus Cohen's  $d = -.232$  [10].

## **Supplementary Note 2.** Inclusion and exclusion criteria for the Early-BipoLife study.

### ***Inclusion criteria***

In order to include all proposed risk factors for bipolar disorder, we recruited the participants in three recruitment pathways<sup>1</sup>.

#### 1. Help-seeking persons:

- Age: 15 to 35 years
- Consultation of an early recognition centre/facility
- Presence of at least one of the proposed risk factors for bipolar disorder: Family history of bipolar disorder, (sub)threshold affective symptomatology/depressive syndrome, hypomanic/mood swings, disturbances of circadian rhythm/sleep other clinical hints

#### 2. Young individuals with diagnosed depression:

- Age: 15 to 35 years
- In- or outpatients with a depressive syndrome in the context of: Major depressive disorder, dysthymic disorder, cyclothymic disorder, minor depressive disorder, recurrent brief depressive disorder, adjustment disorder with depressed mood, depressive disorder Not Otherwise Specified (NOS)

#### 3. Patients with ADHD:

- Age: 15 to 35 years
- In- or outpatients with a clinically confirmed ADHD diagnosis

### ***Exclusion criteria:***

- Diagnosis of: bipolar disorder, schizoaffective disorder, schizophrenia
- Diagnosis of anxiety, obsessive–compulsive or substance

dependence disorder that fully explains the whole symptomatology

- Limited ability to comprehend the study
- Implied expressed negative declaration of intent to participate

in the study by a minor and

- Acute suicidality

**Supplementary Table 1.** Overview of instruments for the bipolar risk assessment tools (adapted according to Bröckel et al.).

| Instrument                   | Risk states                                                                           | N (% Sample) | Validation                                                                                                              | Note                                                                                                                  |
|------------------------------|---------------------------------------------------------------------------------------|--------------|-------------------------------------------------------------------------------------------------------------------------|-----------------------------------------------------------------------------------------------------------------------|
| BPSS-P                       | Attenuated mania symptom syndrome (AMSS)                                              | 54 (20.5)    | Good internal consistency, convergent validity and inter-rater reliability <sup>2</sup>                                 | Semi-structured interview based on the DSM-5 criteria for bipolar disorder and major depressive disorder <sup>2</sup> |
|                              | Genetic mania risk and deterioration syndrome (GMRDS)                                 | 2 (0.8)      |                                                                                                                         |                                                                                                                       |
| BAR criteria                 | Sub-threshold mania, assessed by BPSS-P                                               | 26 (9.9)     | Increased risk of developing bipolar disorders (HR = 5.30), poor prognostic accuracy (Harrell's C = 0.659) <sup>3</sup> | Ultra-high-risk criteria for BD <sup>4</sup>                                                                          |
|                              | Sub-threshold depression, assessed by BPSS-FP or SCID <i>and</i> cyclothymic features | 148 (56.3)   |                                                                                                                         |                                                                                                                       |
|                              | Sub-threshold depression plus genetic risk                                            | 13 (4.9)     |                                                                                                                         |                                                                                                                       |
| Extended BAR criteria (BARS) | Mixed symptoms, assessed by BPSS-P                                                    | 3 (1.1)      | BARS criteria had an adequate prognostic accuracy (Harrell's C = 0.742) and clinical utility <sup>3</sup>               | Extension of the BAR criteria (2 additional symptom domains) <sup>3</sup>                                             |
|                              | Mood swings, assessed by EPI <i>bipolar</i>                                           | 117 (44.5)   |                                                                                                                         |                                                                                                                       |
| EPI <i>bipolar</i>           | No-risk                                                                               | 32 (12.2)    | No longitudinal (ongoing study)                                                                                         | Semi-structured interview                                                                                             |
|                              | Low-risk                                                                              | 130 (49.4)   | Includes and integrates items from validated tools (BPSS-P, BAR) as well as genetic risk                                | Integrates risk factors based on a systematic review of literature <sup>5</sup>                                       |
|                              | High-risk                                                                             | 101 (38.4)   |                                                                                                                         |                                                                                                                       |

**Supplementary Table 2.** Breakdown of demographic characteristics per study site.

| Site      | N- total  | N - female (%) | Mean age (SD) | N – No-risk (%) | N – Low-risk (%) | N – High-risk (%) |
|-----------|-----------|----------------|---------------|-----------------|------------------|-------------------|
| Dresden   | 36 (13.7) | 23 (63.9)      | 25.19 (3.640) | 6 (16.7)        | 19 (52.8)        | 11 (30.6)         |
| Marburg   | 70 (26.6) | 28 (40)        | 24.11 (3.740) | 9 (12.9)        | 34 (48.6)        | 27 (38.6)         |
| Frankfurt | 39 (14.8) | 21 (53.8)      | 26.13 (4.697) | 7 (17.9)        | 16 (41)          | 16 (41)           |
| Berlin    | 59 (22.4) | 27 (45.8)      | 24.71 (4.190) | 5 (8.5)         | 30 (50.8)        | 24 (40.7)         |
| Tuebingen | 19 (7.5)  | 9 (47.4)       | 25.63 (3.639) | 3 (15.8)        | 8 (42.1)         | 8 (42.1)          |
| Bochum    | 8 (3.0)   | 4 (50)         | 28.0 (4.504)  | 2 (25.0)        | 5 (62.5)         | 1 (12.5)          |
| Hamburg   | 32 (12.2) | 15 (46.9)      | 23.41 (5.724) | 0 (0)           | 18 (56.3)        | 14 (43.8)         |

**Supplementary Table 3.** Breakdown of lithium intake per recruitment pathway.

| <b>Recruitment pathway</b>                  | <b>Mood stabilizers N (%)</b> | <b>Lithium N ( %)</b> |
|---------------------------------------------|-------------------------------|-----------------------|
| Help-seeking persons                        | 4 (3.5)                       | 3 (2.5)               |
| Young individuals with diagnosed depression | 6 (5.3)                       | 4 (3.5)               |
| Patients with ADHD                          | 1 (2.8)                       | 0 (0)                 |

**Supplementary Table 4.** *EPIbipolar* risk criteria<sup>5</sup>. Adopted according to Bröckel et al. (in submission). The former ultra high-risk and high-risk groups were fused. The former intermediate-risk group was renamed as low-risk.

| Main risk factors                                                                                                                                                                                   | Secondary risk factors                                                                                                                                                                                                                                                                                                                                                                                                                                               | Risk groups                                                                                                                                                                                                                                                                        |
|-----------------------------------------------------------------------------------------------------------------------------------------------------------------------------------------------------|----------------------------------------------------------------------------------------------------------------------------------------------------------------------------------------------------------------------------------------------------------------------------------------------------------------------------------------------------------------------------------------------------------------------------------------------------------------------|------------------------------------------------------------------------------------------------------------------------------------------------------------------------------------------------------------------------------------------------------------------------------------|
| <ul style="list-style-type: none"> <li>• Family history of bipolar disorder</li> <li>• Increasing cyclothymic mood swings with change of activity</li> <li>• Subthreshold manic symptoms</li> </ul> | <p>Group A</p> <ul style="list-style-type: none"> <li>• specific disturbances in sleep and/or circadian rhythm</li> <li>• increasing cyclothymic mood swings without change of activity</li> <li>• specific depressive features</li> </ul>                                                                                                                                                                                                                           | <p>No-risk:</p> <ul style="list-style-type: none"> <li>• none risk constellations mentioned below are met</li> </ul>                                                                                                                                                               |
|                                                                                                                                                                                                     | <p>Group B</p> <ul style="list-style-type: none"> <li>• positive family history for MDD, schizoaffective disorder or schizophrenia (not applicable if genetic vulnerability for bipolar disorder is a main risk factor)</li> <li>• any affective disorder lifetime</li> <li>• lifetime and present ADHD or conduct disorder</li> <li>• impairment in psychosocial functioning</li> <li>• specific substance misuse</li> <li>• episodic course of symptoms</li> </ul> | <p>Low-risk:</p> <ul style="list-style-type: none"> <li>• one or more risk factors of group A <i>and</i> one or more risk factors of group B, without any main risk-factor</li> <li>• family history of bipolar disorder as main factor, without any other risk factors</li> </ul> |
|                                                                                                                                                                                                     |                                                                                                                                                                                                                                                                                                                                                                                                                                                                      | <p>High-risk:</p> <ul style="list-style-type: none"> <li>• one main risk factors <i>and</i> one or more secondary risk-factors of group A <i>and/or</i> group B are met</li> <li>• <i>or</i> more than one main risk factor</li> </ul>                                             |



**Supplementary Figure 1.** Partial plot for the linear effect of *EPIbipolar* risk on thickness of the left pars opercularis. To create the diagram showing the linear effect of *EPIbipolar* risk on thickness of the left parsopercularis while holding the other independent variables constant, we plotted cortical thickness minus all other regression components as a function of the risk score.

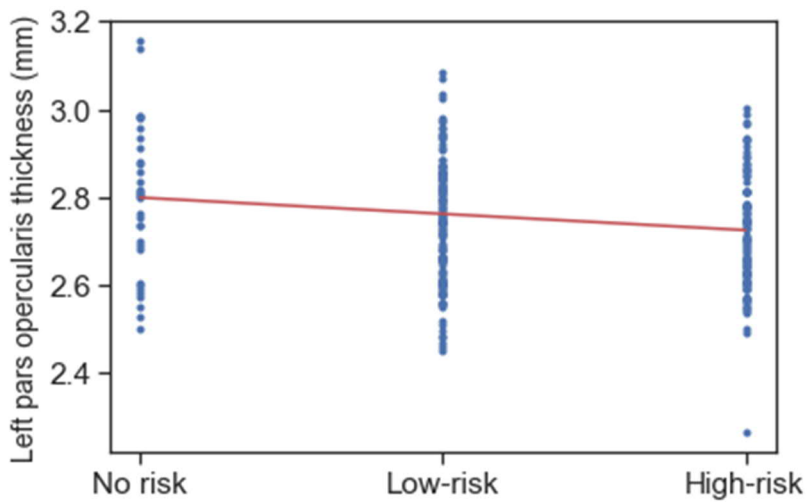

Supplement: MOESM1 [file 41398_2021_1598_MOESM1_ESM.pdf]
